# Supplementary material for: The new MISR research aerosol retrieval algorithm: a multi-angle, multi-spectral, bounded-variable least squares retrieval of aerosol particle properties over both land and water
Source: Copernicus journal article supplement (doi:10.5194/amt-15-6865-2022), 2022-11-24
Supplement: Supplementary file 1 [file amt-15-6865-2022-supplement.pdf]

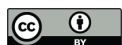

## *Supplement of*

# **The new MISR research aerosol retrieval algorithm: a multi-angle, multi-spectral, bounded-variable least squares retrieval of aerosol particle properties over both land and water**

**James A. Limbacher et al.**

*Correspondence to:* James A. Limbacher ([james.limbacher@nasa.gov](mailto:james.limbacher@nasa.gov))

The copyright of individual parts of the supplement might differ from the article licence.

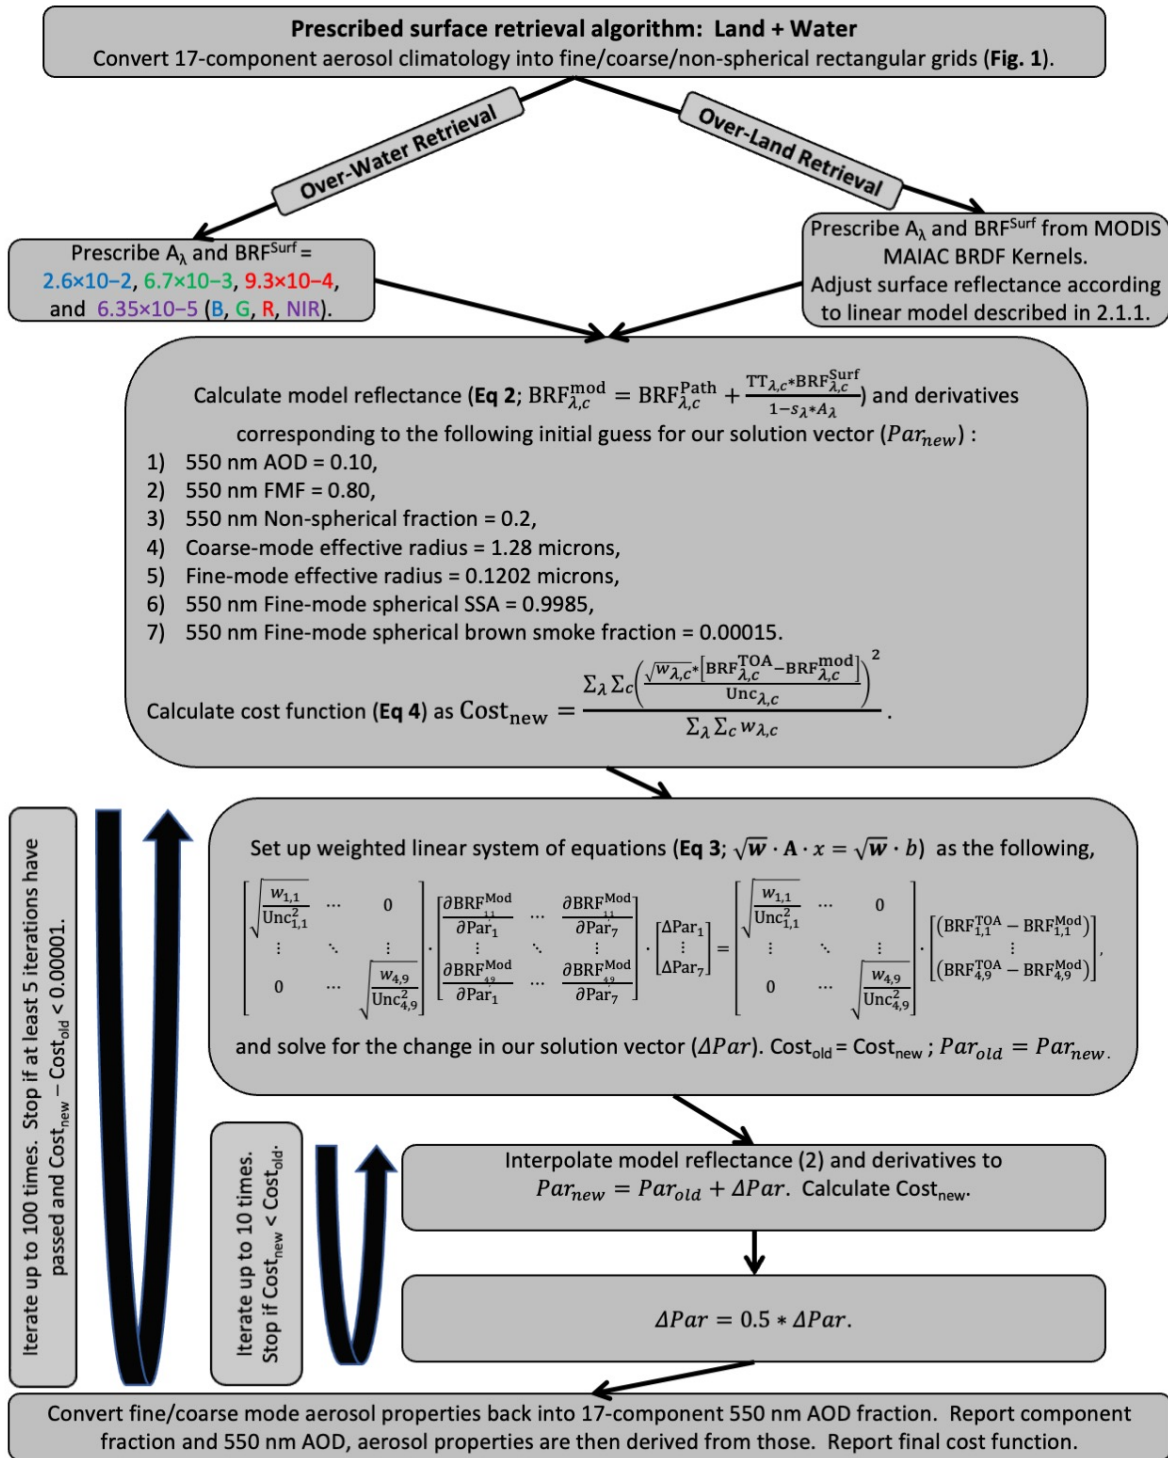

Figure S1) Flow chart of the MISR RA prescribed surface aerosol retrieval.

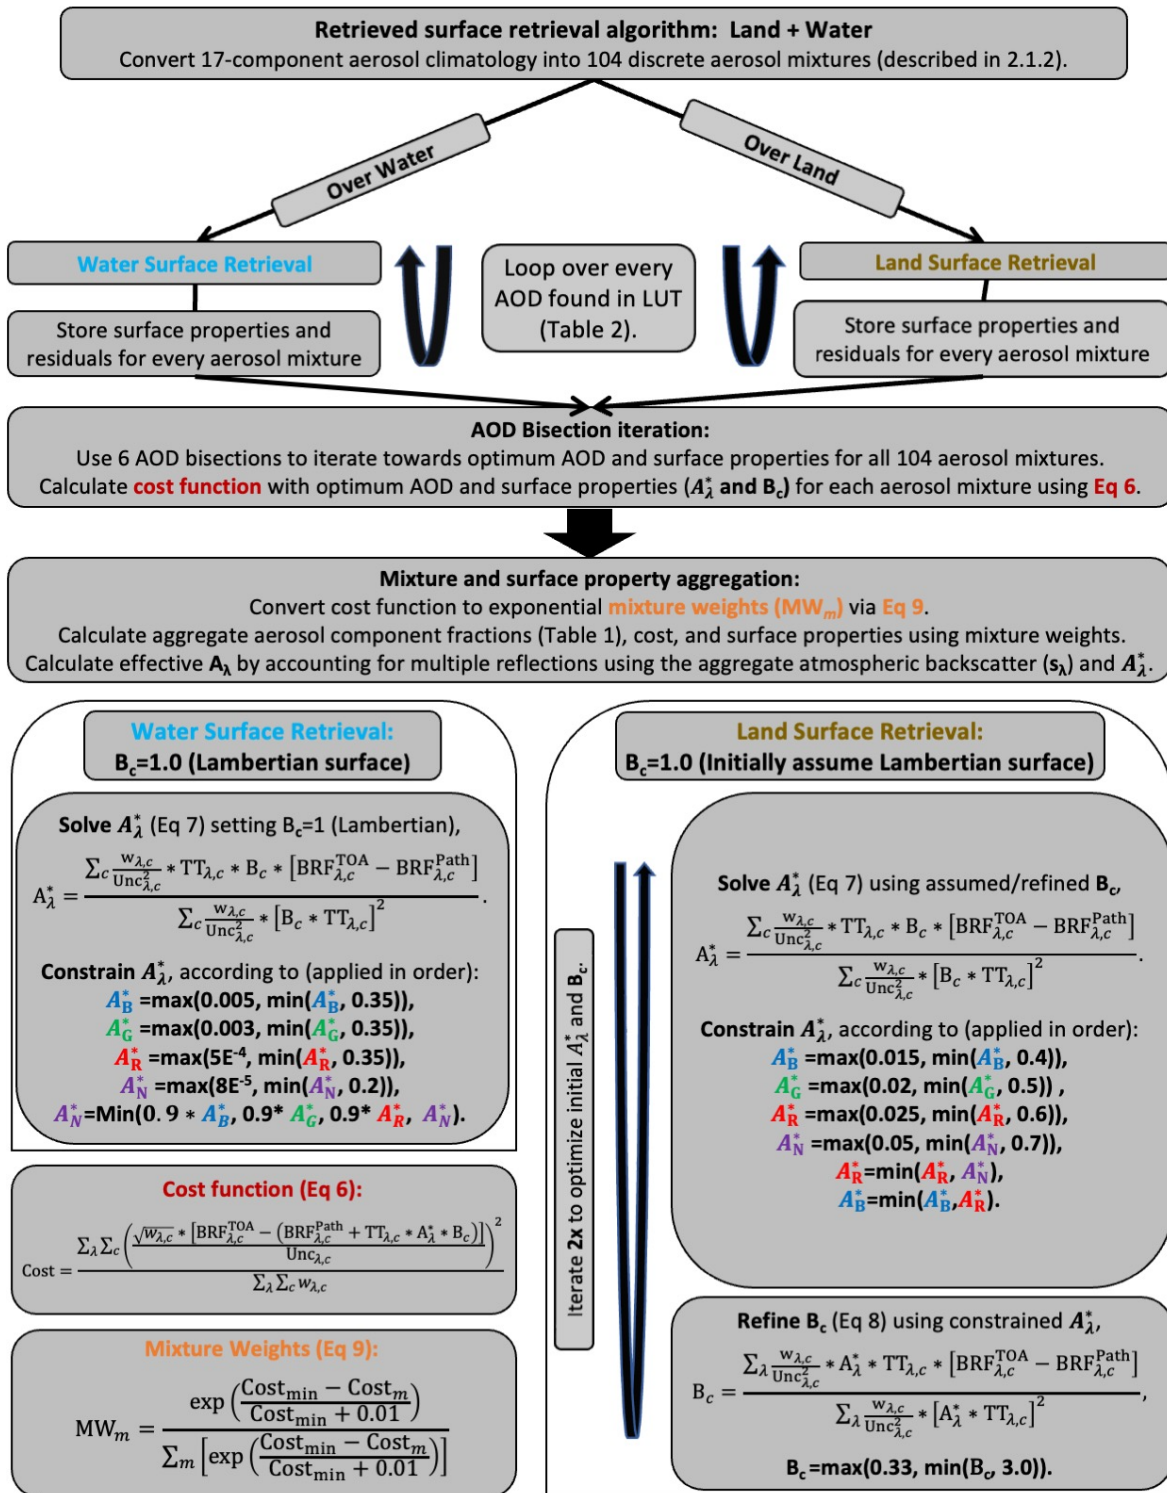

Figure S2) Flow chart of the MISR RA retrieved surface aerosol retrieval.
